# Supplementary material
Source: PubMed Central journal article supplement (PMC3014307)
Supplement: supp_110.171009_JPET171009Supplemental_Figures.pdf [file supp_110.171009_JPET171009Supplemental_Figures.pdf]

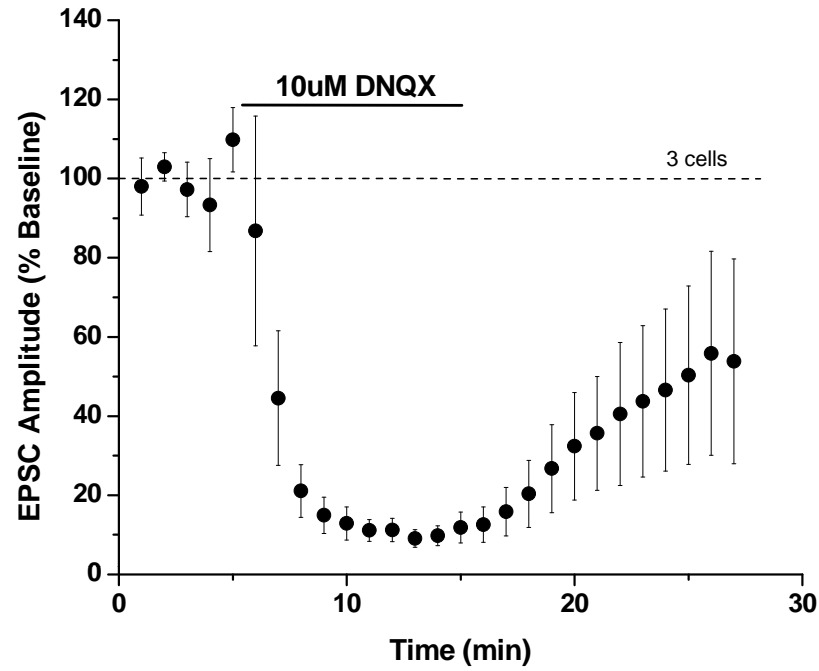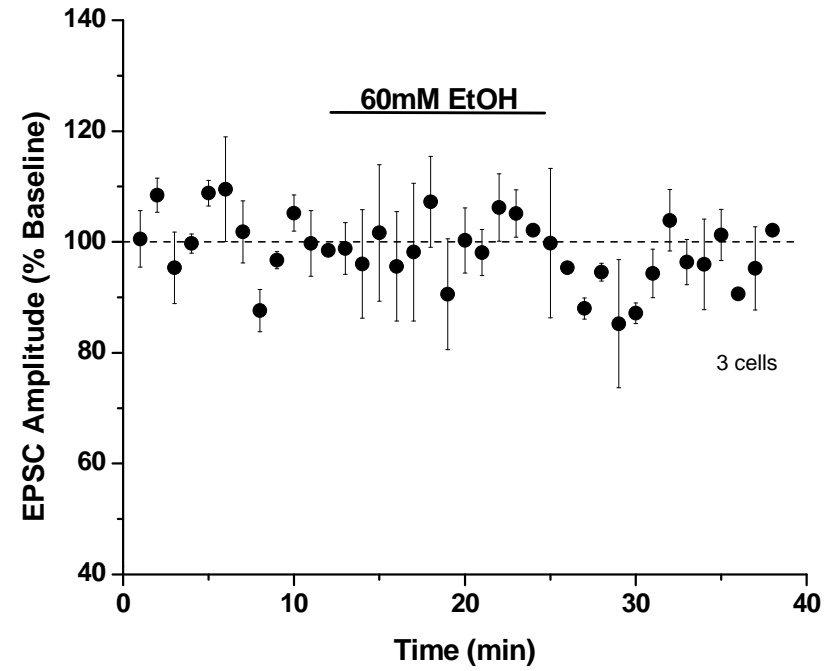

Ethanol-naïve cells @ -80mV;  
EPSCs recorded are AMPA receptor-mediated;  
Ethanol does not alter baseline AMPA EPSCs
